# Supplementary material for: A Two-Stage Chance Constrained Approach with Application to Stochastic Intermodal Service Network Design Problems
Source: Hindawi journal article supplement (doi:10.1155/2018/6051029), 2018-12-24
Supplement: f1 [file 6051029.f1.docx]

# The Lists of Candidate Train and Ship Services for the Numerical Example

Table S1: The candidate train services.

| Service number | Service path | Service time (hours) | Fixed cost  (US$) | Variable cost (US$/TEU) |
| --- | --- | --- | --- | --- |
| 1 |  | 13.9 | 33420 | 317 |
| 2 |  | 6.6 | 7950 | 140 |
| 3 |  | 7.3 | 8760 | 177 |
| 4 |  | 9.8 | 11715 | 207 |
| 5 |  | 4.2 | 4995 | 110 |
| 6 |  | 16.0 | 38580 | 343 |
| 7 |  | 11.9 | 14295 | 233 |
| 8 |  | 18.1 | 43530 | 428 |
| 9 |  | 18.5 | 44340 | 431 |
| 10 |  | 13.7 | 16440 | 314 |
| 11 |  | 4.8 | 5730 | 117 |
| 12 |  | 3.1 | 3765 | 68 |
| 13 |  | 13.4 | 32070 | 250 |
| 14 |  | 8.3 | 19890 | 219 |
| 15 |  | 5.2 | 6180 | 152 |
| 16 |  | 11.5 | 27540 | 318 |
| 17 |  | 8.3 | 10005 | 250 |
| 18 |  | 6.7 | 8040 | 200 |
| 19 |  | 15.7 | 37650 | 398 |
| 20 |  | 12.6 | 15060 | 330 |
| 21 |  | 10.9 | 13095 | 281 |
| 22 |  | 11.3 | 27210 | 226 |
| 23 |  | 3.6 | 4275 | 133 |
| 24 |  | 7.8 | 9330 | 213 |
| 25 |  | 9.3 | 22200 | 231 |
| 26 |  | 5.1 | 6105 | 121 |
| 27 |  | 10.2 | 24570 | 273 |
| 28 |  | 11.3 | 27150 | 316 |
| 29 |  | 11.7 | 27960 | 320 |
| 30 |  | 6.9 | 8250 | 203 |
| 31 |  | 7.7 | 18390 | 212 |
| 32 |  | 4.7 | 11250 | 116 |
| 33 |  | 6.3 | 15120 | 196 |
| 34 |  | 8.7 | 20970 | 225 |
| 35 |  | 4.4 | 5325 | 113 |
| 36 |  | 4.3 | 5160 | 112 |
| 37 |  | 11.6 | 27840 | 289 |
| 38 |  | 8.9 | 21300 | 227 |
| 39 |  | 9.2 | 22110 | 231 |
| 40 |  | 7 | 16680 | 203 |
| 41 |  | 5.8 | 13890 | 189 |
| 42 |  | 8.5 | 20370 | 222 |

Table S2: The candidate ship services.

| Ship service | Origin | Destination | Travel time (days) | Fixed cost (US$) | Variable cost (US$/TEU) |
| --- | --- | --- | --- | --- | --- |
| *Ship* 1 | *Tianjin* | *Singapore* | 11 | 10000 | 175 |
| *Ship* 2 | *Tianjin* | *Singapore* | 10 | 10000 | 185 |
| *Ship* 3 | *Tianjin* | *Singapore* | 12 | 10000 | 170 |
| *Ship* 4 | *Qingdao* | *Singapore* | 12 | 10000 | 165 |
| *Ship* 5 | *Qingdao* | *Singapore* | 11 | 10000 | 170 |
| *Ship* 6 | *Qingdao* | *Singapore* | 10 | 10000 | 185 |
